# Supplementary material for: Association between smoking and incident back pain: A prospective cohort study with 438 510 participants
Source: PubMed Central journal article supplement (PMC10663706; doi:10.7189/jogh.13.04152), 2023-11-22
Supplement: jogh-13-04152-s001.pdf [file jogh-13-04152-s001.pdf]

**Figure S1** Flow chart

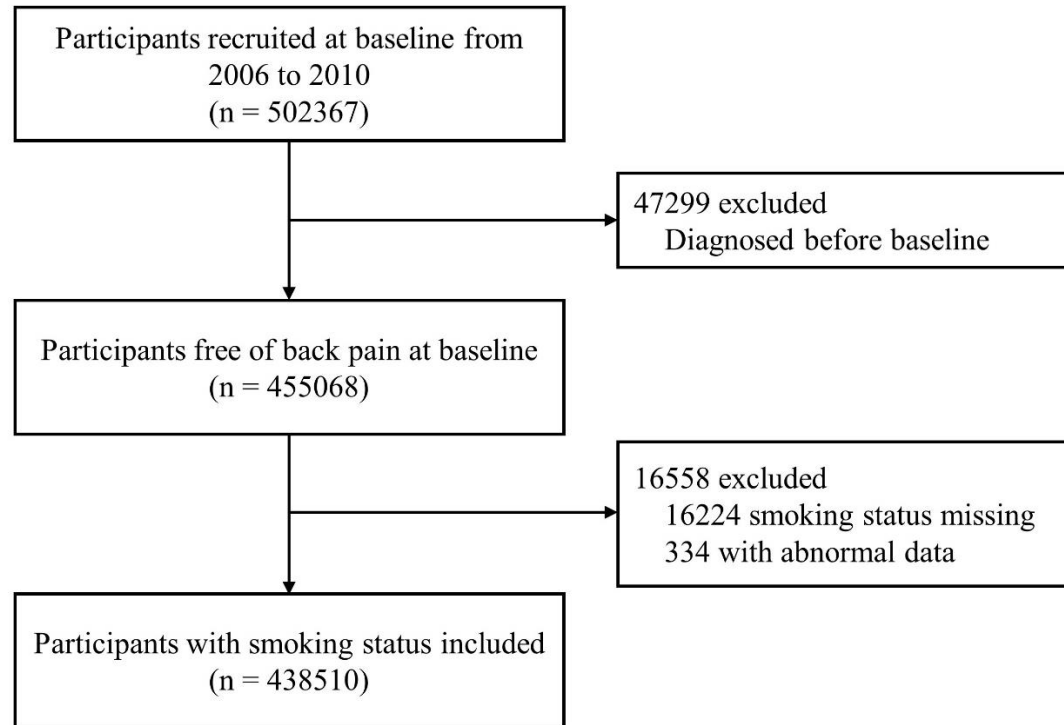

The data of 502367 participants aged 37-73 participants from 2006 to 2010 during baseline assessment were available in the UK Biobank. Participants diagnosed with BP before baseline (n=47,299), without SS data (n=16,224), or with abnormal smoking data (n=334) were excluded, which left 438,510 participants to further analyses.

**Table S1** Disease definitions

| <b>ICD-10 Code</b> | <b>Classification</b>  | <b>Brief Definition</b>                                                    |
|--------------------|------------------------|----------------------------------------------------------------------------|
| M54                | Dorsalgia (back pain)  | General code for various forms of back pain and related conditions.        |
| M54.1              | Radiculopathy          | Pain due to compression or irritation of a spinal nerve, often radiating.  |
| M54.2              | Cervicalgia            | Neck pain, often associated with the cervical spine.                       |
| M54.3              | Sciatica               | Pain that radiates along the sciatic nerve, typically from the lower back. |
| M54.4              | Lumbago with sciatica  | Lower back pain with radiating pain along the sciatic nerve.               |
| M54.5              | Low back pain          | Pain localized in the lower back region.                                   |
| M54.6              | Pain in thoracic spine | Pain occurring in the mid-back area around the thoracic spine.             |
| M54.8              | Other dorsalgia        | Code for other specified forms of back pain conditions.                    |
| M54.9              | Dorsalgia, unspecified | Code for unspecified or undifferentiated back pain.                        |

The Code is following ICD-10 by World Health Organization (WHO). The related information was available in <https://biobank.ndph.ox.ac.uk/showcase/field.cgi?id=41270>

**Table S2** The association between different smoking-related exposures and incident back pain stratified by age

| Smoking Status                  |                            |                         | Number of cigarettes smoked daily |                            |                         | Pack-Years of own Smoking |                            |                         |
|---------------------------------|----------------------------|-------------------------|-----------------------------------|----------------------------|-------------------------|---------------------------|----------------------------|-------------------------|
| Categories                      | n/events                   | HR (95%CI)              | Categories                        | n/events                   | HR (95%CI)              | Categories                | n/events                   | HR (95%CI)              |
| <b>Aged &lt;= 60 (n=273006)</b> |                            |                         |                                   |                            |                         |                           |                            |                         |
| Never                           | 162279/9564                | 1 (ref)                 | None                              | 195605/11560               | 1 (ref)                 | None                      | 196889/11664               | 1 (ref)                 |
| Former                          | 87536/5862                 | <b>1.11 (1.08-1.15)</b> | Up to 10                          | 23244/1578                 | <b>1.12 (1.06-1.18)</b> | Up to 10                  | 23698/1420                 | 1.02 (0.96-1.07)        |
| Current                         | 23191/2222                 | <b>1.52 (1.45-1.59)</b> | Between 11 and 20                 | 40727/3255                 | <b>1.28 (1.23-1.33)</b> | Between 11 and 20         | 21831/1675                 | <b>1.24 (1.18-1.30)</b> |
| P for trend                     | <b><i>p</i> &lt; 0.000</b> | <b>1.20 (1.17-1.22)</b> | Between 21 and 30                 | 9530/861                   | <b>1.41 (1.31-1.51)</b> | Between 21 and 30         | 14956/1336                 | <b>1.39 (1.32-1.48)</b> |
|                                 |                            |                         | More than 30                      | 3900/394                   | <b>1.51 (1.36-1.67)</b> | More than 30              | 15632/1553                 | <b>1.53 (1.45-1.61)</b> |
|                                 |                            |                         | P for trend                       | <b><i>p</i> &lt; 0.000</b> | <b>1.12 (1.11-1.14)</b> | P for trend               | <b><i>p</i> &lt; 0.000</b> | <b>1.11 (1.10-1.13)</b> |
|                                 |                            |                         | HR per 5 units                    | <b><i>p</i> &lt; 0.000</b> | <b>1.06 (1.05-1.07)</b> | HR per 5 units            | <b><i>p</i> &lt; 0.000</b> | <b>1.05 (1.05-1.06)</b> |
| <b>Aged &gt; 60 (n=165504)</b>  |                            |                         |                                   |                            |                         |                           |                            |                         |
| Never                           | 85849/6602                 | 1 (ref)                 | None                              | 108076/8376                | 1 (ref)                 | None                      | 109123/8492                | 1 (ref)                 |
| Former                          | 70587/6258                 | <b>1.17 (1.13-1.21)</b> | Up to 10                          | 15458/1338                 | <b>1.12 (1.06-1.19)</b> | Up to 10                  | 12700/991                  | 1.04 (0.97-1.11)        |
| Current                         | 9068/959                   | <b>1.43 (1.33-1.53)</b> | Between 11 and 20                 | 29540/2787                 | <b>1.22 (1.17-1.28)</b> | Between 11 and 20         | 14144/1192                 | <b>1.09 (1.03-1.16)</b> |
| P for trend                     | <b><i>p</i> &lt; 0.000</b> | <b>1.18 (1.15-1.22)</b> | Between 21 and 30                 | 7657/789                   | <b>1.37 (1.27-1.47)</b> | Between 21 and 30         | 10741/1051                 | <b>1.25 (1.17-1.33)</b> |
|                                 |                            |                         | More than 30                      | 4773/529                   | <b>1.47 (1.34-1.60)</b> | More than 30              | 18796/2093                 | <b>1.46 (1.38-1.53)</b> |
|                                 |                            |                         | P for trend                       | <b><i>p</i> &lt; 0.000</b> | <b>1.10 (1.09-1.12)</b> | P for trend               | <b><i>p</i> &lt; 0.000</b> | <b>1.09 (1.08-1.10)</b> |
|                                 |                            |                         | HR per 5 units                    | <b><i>p</i> &lt; 0.000</b> | <b>1.05 (1.04-1.06)</b> | HR per 5 units            | <b><i>p</i> &lt; 0.000</b> | <b>1.04 (1.03-1.04)</b> |
|                                 |                            |                         | HR per 10 units                   | <b><i>p</i> &lt; 0.000</b> | <b>1.10 (1.08-1.12)</b> | HR per 10 units           | <b><i>p</i> &lt; 0.000</b> | <b>1.08 (1.07-1.09)</b> |

Participants were divided into two subgroups based on age (<= 60 and > 60). All hazard ratios (HRs) and its 95% confident intervals (CIs) were derived from Cox proportional hazards regression. The analyses were adjusted for sex, ethnicity, BMI, educational level, Townsend Deprivation Index and sedentary behaviour.

**Table S3** The association between different smoking-related exposures and incident back pain stratified by BMI

| Smoking Status               |                     |                         | Number of cigarettes smoked daily |                     |                         | Pack-Years of own Smoking |                     |                         |
|------------------------------|---------------------|-------------------------|-----------------------------------|---------------------|-------------------------|---------------------------|---------------------|-------------------------|
| Categories                   | n/events            | HR (95%CI)              | Categories                        | n/events            | HR (95%CI)              | Categories                | n/events            | HR (95%CI)              |
| <b>BMI&lt;30 (n=332718)</b>  |                     |                         |                                   |                     |                         |                           |                     |                         |
| Never                        | 192142/11297        | 1 (ref)                 | None                              | 235142/13962        | 1 (ref)                 | None                      | 236814/14117        | 1 (ref)                 |
| Former                       | 115225/7921         | <b>1.14 (1.10-1.17)</b> | Up to 10                          | 31024/2188          | <b>1.14 (1.09-1.20)</b> | Up to 10                  | 29010/1759          | 1.02 (0.97-1.07)        |
| Current                      | 25351/2349          | <b>1.53 (1.46-1.60)</b> | Between 11 and 20                 | 50827/4010          | <b>1.27 (1.22-1.32)</b> | Between 11 and 20         | 26557/1976          | <b>1.22 (1.16-1.28)</b> |
| P for trend                  | <b>p &lt; 0.000</b> | <b>1.20 (1.17-1.22)</b> | Between 21 and 30                 | 11036/981           | <b>1.44 (1.35-1.54)</b> | Between 21 and 30         | 17976/1564          | <b>1.39 (1.32-1.46)</b> |
|                              |                     |                         | More than 30                      | 4689/426            | <b>1.45 (1.32-1.60)</b> | More than 30              | 22361/2151          | <b>1.49 (1.42-1.56)</b> |
|                              |                     |                         | P for trend                       | <b>p &lt; 0.000</b> | <b>1.12 (1.11-1.14)</b> | P for trend               | <b>p &lt; 0.000</b> | <b>1.11 (1.09-1.12)</b> |
|                              |                     |                         | HR per 5 units                    | <b>p &lt; 0.000</b> | <b>1.06 (1.05-1.07)</b> | HR per 5 units            | <b>p &lt; 0.000</b> | <b>1.05 (1.04-1.05)</b> |
|                              |                     |                         | HR per 10 units                   | <b>p &lt; 0.000</b> | <b>1.12 (1.11-1.14)</b> | HR per 10 units           | <b>p &lt; 0.000</b> | <b>1.09 (1.08-1.10)</b> |
| <b>BMI&gt;=30 (n=105792)</b> |                     |                         |                                   |                     |                         |                           |                     |                         |
| Never                        | 55986/4869          | 1 (ref)                 | None                              | 68539/5974          | 1 (ref)                 | None                      | 69198/6039          | 1 (ref)                 |
| Former                       | 42898/4199          | <b>1.13 (1.08-1.18)</b> | Up to 10                          | 7678/728            | 1.07 (0.99-1.15)        | Up to 10                  | 7388/652            | 1.05 (0.96-1.13)        |
| Current                      | 6908/832            | <b>1.40 (1.30-1.51)</b> | Between 11 and 20                 | 19440/2032          | <b>1.20 (1.14-1.26)</b> | Between 11 and 20         | 9418/891            | <b>1.10 (1.03-1.18)</b> |
| P for trend                  | <b>p &lt; 0.000</b> | <b>1.16 (1.12-1.20)</b> | Between 21 and 30                 | 6151/669            | <b>1.28 (1.18-1.39)</b> | Between 21 and 30         | 7721/823            | <b>1.22 (1.14-1.32)</b> |
|                              |                     |                         | More than 30                      | 3984/497            | <b>1.46 (1.33-1.60)</b> | More than 30              | 12067/1495          | <b>1.40 (1.32-1.49)</b> |
|                              |                     |                         | P for trend                       | <b>p &lt; 0.000</b> | <b>1.09 (1.08-1.11)</b> | P for trend               | <b>p &lt; 0.000</b> | <b>1.08 (1.07-1.10)</b> |
|                              |                     |                         | HR per 5 units                    | <b>p &lt; 0.000</b> | <b>1.04 (1.04-1.05)</b> | HR per 5 units            | <b>p &lt; 0.000</b> | <b>1.03 (1.03-1.04)</b> |
|                              |                     |                         | HR per 10 units                   | <b>p &lt; 0.000</b> | <b>1.09 (1.07-1.11)</b> | HR per 10 units           | <b>p &lt; 0.000</b> | <b>1.07 (1.05-1.08)</b> |

Participants were divided into two subgroups based on BMI (< 30 and ≥30). All hazard ratios (HRs) and its 95% confident intervals (CIs) were derived from Cox proportional hazards regression. The analyses were adjusted for age, sex, ethnicity, educational level, Townsend Deprivation Index and sedentary behaviour.

**Table S4** The association between different smoking-related exposures and incident back pain after excluding missing covariates

| Smoking Status |                            |                         | Number of cigarettes smoked daily |                            |                         | Pack-Years of own Smoking |                            |                         |
|----------------|----------------------------|-------------------------|-----------------------------------|----------------------------|-------------------------|---------------------------|----------------------------|-------------------------|
| Categories     | n/events                   | HR (95%CI)              | Categories                        | n/events                   | HR (95%CI)              | Categories                | n/events                   | HR (95%CI)              |
| Never          | 235637/15006               | 1 (ref)                 | None                              | 289025/18577               | 1 (ref)                 | None                      | 290209/18688               | 1 (ref)                 |
| Former         | 151285/11446               | <b>1.13 (1.11-1.16)</b> | Up to 10                          | 36688/2709                 | <b>1.12 (1.08-1.17)</b> | Up to 10                  | 35147/2298                 | 1.03 (0.99-1.08)        |
| Current        | 29881/2908                 | <b>1.51 (1.45-1.58)</b> | Between 11 and 20                 | 66699/5656                 | <b>1.25 (1.21-1.28)</b> | Between 11 and 20         | 34476/2706                 | <b>1.18 (1.13-1.22)</b> |
| P for trend    | <b><i>p</i> &lt; 0.000</b> | <b>1.19 (1.17-1.21)</b> | Between 21 and 30                 | 16245/1552                 | <b>1.38 (1.31-1.46)</b> | Between 21 and 30         | 24449/2240                 | <b>1.33 (1.27-1.39)</b> |
|                |                            |                         | More than 30                      | 8146/866                   | <b>1.47 (1.37-1.58)</b> | More than 30              | 32522/3428                 | <b>1.47 (1.41-1.53)</b> |
|                |                            |                         | P for trend                       | <b><i>p</i> &lt; 0.000</b> | <b>1.11 (1.10-1.12)</b> | P for trend               | <b><i>p</i> &lt; 0.000</b> | <b>1.10 (1.09-1.11)</b> |
|                |                            |                         | HR per 5 units                    | <b><i>p</i> &lt; 0.000</b> | <b>1.05 (1.05-1.06)</b> | HR per 5 units            | <b><i>p</i> &lt; 0.000</b> | <b>1.04 (1.04-1.05)</b> |
|                |                            |                         | HR per 10 units                   | <b><i>p</i> &lt; 0.000</b> | <b>1.11 (1.10-1.12)</b> | HR per 10 units           | <b><i>p</i> &lt; 0.000</b> | <b>1.08 (1.08-1.09)</b> |

All hazard ratios (HRs) and its 95% confident intervals (CIs) were derived from Cox proportional hazards regression. The analyses were adjusted for age, sex ethnicity, BMI, educational level, Townsend Deprivation Index and sedentary behaviour.

**Table S5** The association between different smoking-related exposures and incident back pain after excluding participants with self-reported chronic back pain

| Smoking Status |                            |                         | Number of cigarettes smoked daily |                            |                         | Pack-Years of own Smoking |                            |                         |
|----------------|----------------------------|-------------------------|-----------------------------------|----------------------------|-------------------------|---------------------------|----------------------------|-------------------------|
| Categories     | n/events                   | HR (95%CI)              | Categories                        | n/events                   | HR (95%CI)              | Categories                | n/events                   | HR (95%CI)              |
| Never          | 209734/13657               | 1 (ref)                 | None                              | 256776/16855               | 1 (ref)                 | None                      | 258756/17051               | 1 (ref)                 |
| Former         | 133838/10251               | <b>1.13 (1.10-1.16)</b> | Up to 10                          | 32672/2462                 | <b>1.12 (1.08-1.17)</b> | Up to 10                  | 30790/2061                 | 1.04 (0.99-1.08)        |
| Current        | 27176/2709                 | <b>1.52 (1.46-1.59)</b> | Between 11 and 20                 | 59425/5114                 | <b>1.24 (1.20-1.28)</b> | Between 11 and 20         | 30475/2407                 | <b>1.16 (1.11-1.21)</b> |
| P for trend    | <b><i>p</i> &lt; 0.000</b> | <b>1.19 (1.17-1.22)</b> | Between 21 and 30                 | 14540/1411                 | <b>1.39 (1.31-1.46)</b> | Between 21 and 30         | 21726/2002                 | <b>1.33 (1.25-1.37)</b> |
|                |                            |                         | More than 30                      | 7335/775                   | <b>1.44 (1.34-1.55)</b> | More than 30              | 29001/3096                 | <b>1.46 (1.40-1.52)</b> |
|                |                            |                         | P for trend                       | <b><i>p</i> &lt; 0.000</b> | <b>1.11 (1.10-1.12)</b> | P for trend               | <b><i>p</i> &lt; 0.000</b> | <b>1.10 (1.09-1.11)</b> |
|                |                            |                         | HR per 5 units                    | <b><i>p</i> &lt; 0.000</b> | <b>1.05 (1.05-1.06)</b> | HR per 5 units            | <b><i>p</i> &lt; 0.000</b> | <b>1.04 (1.04-1.04)</b> |
|                |                            |                         | HR per 10 units                   | <b><i>p</i> &lt; 0.000</b> | <b>1.11 (1.10-1.12)</b> | HR per 10 units           | <b><i>p</i> &lt; 0.000</b> | <b>1.08 (1.07-1.09)</b> |

All hazard ratios (HRs) and its 95% confident intervals (CIs) were derived from Cox proportional hazards regression. The analyses were adjusted for age, sex ethnicity, BMI, educational level, Townsend Deprivation Index and sedentary behaviour.
